# Supplementary material for: Next-generation sequencing identifies seasonal and geographical differences in the ruminal community composition of sika deer (Cervus nippon) in Japan
Source: Research Square preprint supplement (doi:10.21203/rs.3.rs-783658/v1), 2021-08-06
Supplement: Supplementary file 1 [file 6d24489af9dc7bddd7c50cfb.xlsx]

## Sheet: Table 1 
Number of read counts, OTUs, and results of alpha-diversity metrics of the ruminal community groups by season and location
Ruminal community	Groups a)	Number of samples	Read count/sample b)	OTU/sample b)	Observed OTUs b)	q-value c)	Shannon b)	q-value c)	Faith’s PD b)	q-value c)	Pielou’s evenness b)	q-value c)
Bacteria	NW	12	303,368 (104,305)	348.4 (48.4)	1873.8 (481.3)	0.833029	8.9 (0.7)	0.405516	126.2 (23.4)	0.540291	0.82 (0.04)	0.099289
	NS	10	256,181 (30,447)	388.5 (25.1)	2174.8 (322.7)	0.586901	9.1 (0.6)	0.428794	145.5 (14.2)	0.514173	0.82 (0.04)	0.099289
	HW	5	168,101 (10,281)	397.8 (12.4)	1998.4 (171.7)	0.586901	9.5 (0.3)	0.405516	141.4 (8.1)	0.225067	0.86 (0.02)	0.895082
	p-value d)				0.41985		0.336858		0.183556		0.119165
Eukaryota e)	NW	12	302,958 (171,675)	44.9 (16.4)	65.4 (20.9)	0.711671	1.4 (0.5)	0.023	14.6 (5.0)	0.75183	0.24 (0.09)	0.023
	NS	10	191,784 (72,609)	48.9 (6.9)	78.0 (16.1)	0.49078	2.4 (0.6)	0.002314	17.4 (4.0)	0.212467	0.38 (0.09)	0.005824
	HW	5	166,911 (53,320)	44.8 (16.7)	71.4 (27.1)	0.49078	2.2 (0.5)	0.540291	13.3 (2.5)	0.212467	0.36 (0.07)	0.624206
	p-value d)				0.374034		0.00132696		0.1714		0.00280026
Chloroplast	NW	12	114621 (98009)	35.6 (11.7)	70.3 (28.9)	0.225149	2.6 (0.8)	0.291841	2.5 (0.4)	0.137535	0.4 (0.1)	0.137535
	NS	10	62179 (26875)	44.8 (8.4)	107.7 (36.4)	0.0566145	3.7 (0.8)	0.0528226	2.6 (0.4)	0.692379	0.6 (0.1)	0.692379
	HW	5	30892 (23085)	26.2 (9.2)	53.4 (24.7)	0.0504918	2.8 (0.8)	0.16702	2.0 (0.4)	0.137535	0.5 (0.1)	0.137535
	p-value d)				0.0211151		0.0361777		0.143484		0.205235
a) NW, Nagano winter; NS, Nagano spring; HW, Hokkaido winter
b) () indicates standard deviation
c) q-values for each pair were calculated by pairwise Kruskal-Wallis test. q-values in NW, NS, and HW show the statistics against HW, NW, and NS, respectively.
d) p-values for all groups were calculated by Kruskal-Wallis test.
e) Mitochondria and chloroplast taxa were excluded.

## Sheet: Table 2 
Table 2. Statistical results of beta diversity metrics of the ruminal community groups by season and location
Statistics	Groups b)	Number of samples	Ruminal community
			Bacteria				Eukaryota c)				Chloroplast
			Jaccard	Bray–Curtis	unweighted UniFrac	weighted UniFrac	Jaccard	Bray–Curtis	unweighted UniFrac	weighted UniFrac	Jaccard	Bray–Curtis	unweighted UniFrac	weighted UniFrac
Permanova a) (p-value)	All	27	0.001	0.001	0.001	0.005	0.001	0.021	0.006	0.022	0.001	0.001	0.001	0.01
Pairwise permanova a)	NW vs NS	22	0.005	0.006	0.014	0.05	0.0015	0.228	0.11	0.157	0.009	0.007	0.022	0.132
(q-value)	NW vs HW	17	0.0015	0.003	0.006	0.05	0.002	0.045	0.0555	0.0735	0.003	0.003	0.022	0.012
	NS vs HW	15	0.0015	0.0045	0.003	0.012	0.0015	0.018	0.021	0.033	0.003	0.006	0.018	0.12
a) Number of permutations = 999
b) NW, Nagano winter; NS, Nagano spring; HW, Hokkaido winter
c) Mitochondria and chloroplast taxa were excluded.

## Sheet: Table 3
Table 3. Group-specific predicted taxa annotated by Swiss-Prot and analyzed by TCC-bayseq (q-value < 0.05)
Order	Estimate taxon annotated for the estimate transcripts using Swiss-Prot	Description in Swiss-Prot (Number of annotations)
HW>other	Bacteria; Firmicutes; Clostridia; Clostridiales; Clostridiaceae; Clostridium	Glyceraldehyde-3-phosphate dehydrogenase (9), Flagellin (4)
	Bacteria; Bacteroidetes; Bacteroidia; Bacteroidales; Bacteroidaceae; Bacteroides	Enolase (8)
	Bacteria; Firmicutes; Bacilli; Bacillales; Bacillaceae; Bacillus	Flagellin (6), Phosphocarrier protein HPr (1)
	Bacteria; Firmicutes; Bacilli; Bacillales; Staphylococcaceae; Staphylococcus	Phosphoenolpyruvate-protein phosphotransferase (2), Phosphocarrier protein HPr (2)
	Bacteria; Firmicutes; Negativicutes; Selenomonadales; Selenomonadaceae; Selenomonas	L-lactate dehydrogenase (4)
	Bacteria; Spirochaetes; Spirochaetales; Spirochaetaceae; Treponema	Flagellin FlaB1 (3), Fructose-bisphosphate aldolase (3) , Flagellar filament 33 kDa core protein (1)
	Bacteria; Firmicutes; Bacilli; Bacillales; Bacillaceae; Geobacillus	Glycogen biosynthesis protein GlgD (2), Glucose-1-phosphate adenylyltransferase (1)
	Bacteria; Firmicutes; Clostridia; Thermoanaerobacterales; Thermoanaerobacteraceae; Carboxydothermus	Glucose-6-phosphate isomerase (2), Phosphoglycerate kinase (1)
	Bacteria; Proteobacteria; Gammaproteobacteria; Enterobacterales; Enterobacteriaceae; Escherichia	Raffinose invertase (2)
	Bacteria; Proteobacteria; Gammaproteobacteria; Legionellales; Legionellaceae; Tatlockia	Flagellin (2)
	Bacteria; Firmicutes; Bacilli; Lactobacillales; Lactobacillaceae; Lactobacillus	Phosphoenolpyruvate-protein phosphotransferase (1)
	Bacteria; Firmicutes; Bacilli; Lactobacillales; Streptococcaceae; Streptococcus	Glyceraldehyde-3-phosphate dehydrogenase (1)
	Bacteria; Proteobacteria; Alphaproteobacteria; Sphingomonadales; Sphingomonadaceae; Zymomonas	Sucrose-6-phosphate hydrolase (1)
	Bacteria; Proteobacteria; Betaproteobacteria; Neisseriales; Neisseriaceae; Neisseria	Iron-regulated protein FrpC (1)
	Bacteria; Proteobacteria; Deltaproteobacteria; Desulfuromonadales ; Geobacteraceae; Geobacter	4-hydroxy-3-methylbut-2-enyl diphosphate reductase (1)
	Bacteria; Proteobacteria; Gammaproteobacteria; Enterobacterales; Pectobacteriaceae; Dickeya	Serralysin C (1)
	Bacteria; Spirochaetes; Brachyspirales; Brachyspiraceae; Brachyspira	Flagellar filament core protein flaB2 (1)
	Eukaryota; Viridiplantae; Streptophyta; Embryophyta; Tracheophyta; Spermatophyta; Magnoliopsida; Liliopsida; Asparagales; Orchidaceae; Epidendroideae; Vandeae; Aeridinae; Phalaenopsis	Uncharacterized protein ORF91 (2)
	Eukaryota; Metazoa; Chordata; Craniata; Vertebrata; Euteleostomi; Mammalia; Eutheria; Laurasiatheria; Perissodactyla; Equidae; Equus	1,4-alpha-glucan-branching enzyme (1)
	Eukaryota; Metazoa; Ecdysozoa; Arthropoda; Crustacea; Multicrustacea; Malacostraca; Eumalacostraca; Eucarida; Decapoda; Pleocyemata; Achelata; Palinuroidea; Palinuridae; Panulirus	Glyceraldehyde-3-phosphate dehydrogenase (1)
NS>other	Viruses; Riboviria; Solemoviridae; Sobemovirus	Movement protein P1 (2), Polyprotein P2A (6), Replicase polyprotein P2AB (4), Capsid protein (2)
	Viruses; Riboviria; Tombusviridae; Procedovirinae; Betanecrovirus	RNA-directed RNA polymerase (9)
	Viruses; Riboviria; Tombusviridae; Procedovirinae; Alphanecrovirus	Capsid protein (8)
	Viruses; Riboviria; Orthornavirae; Kitrinoviricota; Alsuviricetes; Martellivirales; Bromoviridae; Cucumovirus Hemiptera	Capsid protein (1)
NW>other	Eukaryota; Fungi; Dikarya; Ascomycota; Taphrinomycotina; Schizosaccharomycetes; Schizosaccharomycetales; Schizosaccharomycetaceae; Schizosaccharomyces	Heat shock protein 16 (1)
	Eukaryota; Metazoa; Chordata; Craniata; Vertebrata; Euteleostomi; Amphibia; Batrachia; Anura; Pipoidea; Pipidae; Xenopodinae; Xenopus; Xenopus	Polyubiquitin (1)
	Viruses; Riboviria; Orthornavirae; Kitrinoviricota; Alsuviricetes; Martellivirales; Bromoviridae; Bromovirus	RNA-directed RNA polymerase 2a (1), Replication protein 1a (1), Capsid protein (1), Movement protein (1)
	Viruses; Riboviria; Tymovirales; Alphaflexiviridae; Potexvirus	Movement and silencing protein TGBp1 (1)
other>HW	Bacteria; Firmicutes; Bacilli; Bacillales; Bacillaceae; Bacillus	N-acetylmuramoyl-L-alanine amidase XlyA (1)
	Eukaryota; Fungi; Dikarya; Ascomycota; Taphrinomycotina; Schizosaccharomycetes; Schizosaccharomycetales; Schizosaccharomycetaceae; Schizosaccharomyces	Heat shock protein 16 (3)
	Eukaryota; Viridiplantae; Streptophyta; Embryophyta; Tracheophyta; Spermatophyta; Magnoliopsida; Liliopsida; Poales; Poaceae; BOP clade; Oryzoideae; Oryzeae; Oryzinae; Oryza; Oryza sativa	17.7 kDa class I heat shock protein (3)
	Eukaryota; Fungi; Dikarya; Ascomycota; Pezizomycotina; Sordariomycetes; Hypocreomycetidae; Hypocreales; Hypocreaceae; Trichoderma	14-3-3 protein homolog (1)
	Eukaryota; SAR; Alveolata; Apicomplexa; Aconoidasida; Haemosporida; Plasmodiidae; Plasmodium; Plasmodium (Laverania)	Elongation factor 1-alpha (1)
	Eukaryota; Viridiplantae; Streptophyta; Embryophyta; Tracheophyta; Spermatophyta; Magnoliopsida; eudicotyledons; Gunneridae; Pentapetalae; rosids; malvids; Brassicales; Brassicaceae; Camelineae; Arabidopsis	17.6 kDa class I heat shock protein 3 (1)
other>NW	Bacteria; Chlorobi; Chlorobia; Chlorobiales; Chlorobiaceae; Prosthecochloris	Phosphoglycerate kinase (1)
	Bacteria; Firmicutes; Clostridia; Clostridiales; Clostridiaceae; Clostridium	Flagellin (1)
	Bacteria; Proteobacteria; Gammaproteobacteria; Enterobacterales; Enterobacteriaceae; Klebsiella	PTS system sucrose-specific EIIBC component (1)
other>NS	Eukaryota; Viridiplantae; Streptophyta; Embryophyta; Tracheophyta; Spermatophyta; Magnoliopsida; Liliopsida; Asparagales; Orchidaceae; Epidendroideae; Vandeae; Aeridinae; Phalaenopsis	Uncharacterized protein ORF91 (2)
	Eukaryota; Fungi; Dikarya; Ascomycota; Saccharomycotina; Saccharomycetes; Saccharomycetales; Saccharomycetaceae; Saccharomyces	Regulator of rDNA transcription protein 15 (1)
